# Supplementary material for: Integration RNA bulk and single cell RNA sequencing to explore the change of BCAA metabolism-related immune microenvironment and construct prognostic signature in HNSCC
Source: Research Square preprint supplement (doi:10.21203/rs.3.rs-6030799/v1), 2025-06-25
Supplement: Supplementary file 1 [file 27360cbb62cdd9eb43d35c18.xlsx]

## Sheet: A
pvalue	padj	immune_cell	sig
0.000190002	0.000354671	Activated B cell	Activated B cell***
3.56097e-07	2.49268e-06	CD56bright natural killer cell	CD56bright natural killer cell****
9.47978e-05	0.00020418	Central memory CD4 T cell	Central memory CD4 T cell****
1.92117e-05	5.97699e-05	Central memory CD8 T cell	Central memory CD8 T cell****
4.81094e-05	0.00012246	Effector memeory CD4 T cell	Effector memeory CD4 T cell****
0.000969304	0.00169628	Effector memeory CD8 T cell	Effector memeory CD8 T cell***
1.60791e-05	5.62768e-05	Eosinophil	Eosinophil****
0.00414066	0.00610203	Gamma delta T cell	Gamma delta T cell**
2.76785e-05	7.74997e-05	Immature B cell	Immature B cell****
4.00417e-10	5.60584e-09	Mast cell	Mast cell****
0.00163659	0.00269555	MDSC	MDSC**
0.018402	0.0257628	Memory B cell	Memory B cell*
0.000160304	0.000320608	Monocyte	Monocyte***
3.76741e-06	1.50697e-05	Natural killer cell	Natural killer cell****
3.168e-06	1.4784e-05	Neutrophil	Neutrophil****
1.38014e-11	3.86441e-10	Plasmacytoid dendritic cell	Plasmacytoid dendritic cell****
0.0017841	0.00277527	Regulatory T cell	Regulatory T cell**
1.37258e-08	1.28107e-07	T follicular helper cell	T follicular helper cell****
7.21872e-05	0.000168437	Type 1 T helper cell	Type 1 T helper cell****
1.3404e-06	7.50623e-06	Type 17 T helper cell	Type 17 T helper cell****

## Sheet: B
	gene	cell	Correlation	Pvalue
1	SMS	Activated B cell	-0.189156	2.02752e-05
2	PRDX6	Activated B cell	-0.0346468	0.439052
3	GSTO1	Activated B cell	-0.0483341	0.280235
4	ADA	Activated B cell	-0.055181	0.217586
5	SMS	CD56bright natural killer cell	0.242148	4.05686e-08
6	PRDX6	CD56bright natural killer cell	0.0336259	0.452664
7	GSTO1	CD56bright natural killer cell	0.371366	7.90118e-18
8	ADA	CD56bright natural killer cell	0.23766	7.30182e-08
9	SMS	Central memory CD4 T cell	-0.171763	0.000111676
10	PRDX6	Central memory CD4 T cell	-0.264335	1.8661e-09
11	GSTO1	Central memory CD4 T cell	0.00225045	0.959926
12	ADA	Central memory CD4 T cell	0.0942386	0.0349643
13	SMS	Central memory CD8 T cell	-0.147071	0.000961212
14	PRDX6	Central memory CD8 T cell	-0.223826	4.15422e-07
15	GSTO1	Central memory CD8 T cell	-0.0804675	0.0719355
16	ADA	Central memory CD8 T cell	0.0408115	0.361988
17	SMS	Effector memeory CD4 T cell	-0.133268	0.00280049
18	PRDX6	Effector memeory CD4 T cell	-0.15905	0.00035171
19	GSTO1	Effector memeory CD4 T cell	-0.0566644	0.205452
20	ADA	Effector memeory CD4 T cell	-0.0721179	0.1069
21	SMS	Effector memeory CD8 T cell	-0.231453	1.61463e-07
22	PRDX6	Effector memeory CD8 T cell	-0.132229	0.00302369
23	GSTO1	Effector memeory CD8 T cell	-0.00257433	0.954165
24	ADA	Effector memeory CD8 T cell	0.0584548	0.19147
25	SMS	Eosinophil	-0.18767	2.36049e-05
26	PRDX6	Eosinophil	-0.166531	0.000180874
27	GSTO1	Eosinophil	-0.0740976	0.0975876
28	ADA	Eosinophil	-0.0201601	0.652593
29	SMS	Gamma delta T cell	-0.124536	0.00524795
30	PRDX6	Gamma delta T cell	-0.215066	1.18119e-06
31	GSTO1	Gamma delta T cell	0.0717497	0.108707
32	ADA	Gamma delta T cell	0.11715	0.0086737
33	SMS	Immature B cell	-0.214819	1.21565e-06
34	PRDX6	Immature B cell	-0.152615	0.000609043
35	GSTO1	Immature B cell	-0.100473	0.0245149
36	ADA	Immature B cell	0.0218443	0.625707
37	SMS	Mast cell	-0.231161	1.6752e-07
38	PRDX6	Mast cell	-0.206422	3.17623e-06
39	GSTO1	Mast cell	-0.105822	0.0178189
40	ADA	Mast cell	-0.157906	0.000388347
41	SMS	MDSC	-0.193096	1.34708e-05
42	PRDX6	MDSC	-0.0968476	0.0302025
43	GSTO1	MDSC	0.0469301	0.294458
44	ADA	MDSC	0.0695259	0.120138
45	SMS	Memory B cell	-0.0569251	0.203372
46	PRDX6	Memory B cell	-0.145045	0.00113123
47	GSTO1	Memory B cell	-0.0558752	0.211845
48	ADA	Memory B cell	-0.00483622	0.914012
49	SMS	Monocyte	-0.174033	9.01901e-05
50	PRDX6	Monocyte	-0.116241	0.00920983
51	GSTO1	Monocyte	-0.057905	0.195687
52	ADA	Monocyte	-0.0157571	0.724963
53	SMS	Natural killer cell	-0.186252	2.726e-05
54	PRDX6	Natural killer cell	-0.22926	2.12598e-07
55	GSTO1	Natural killer cell	-0.0952131	0.0331158
56	ADA	Natural killer cell	0.0188227	0.67427
57	SMS	Neutrophil	-0.176272	7.28573e-05
58	PRDX6	Neutrophil	-0.361271	6.83747e-17
59	GSTO1	Neutrophil	-0.148935	0.000825898
60	ADA	Neutrophil	0.0510102	0.254431
61	SMS	Plasmacytoid dendritic cell	-0.209102	2.34769e-06
62	PRDX6	Plasmacytoid dendritic cell	-0.363867	3.9539e-17
63	GSTO1	Plasmacytoid dendritic cell	-0.172185	0.000107342
64	ADA	Plasmacytoid dendritic cell	-0.096663	0.03052
65	SMS	Regulatory T cell	-0.136033	0.00227757
66	PRDX6	Regulatory T cell	-0.211376	1.81082e-06
67	GSTO1	Regulatory T cell	0.0397327	0.374827
68	ADA	Regulatory T cell	0.0983037	0.0277949
69	SMS	T follicular helper cell	-0.261265	2.9079e-09
70	PRDX6	T follicular helper cell	-0.237018	7.93484e-08
71	GSTO1	T follicular helper cell	-0.0512303	0.252385
72	ADA	T follicular helper cell	0.00894196	0.841753
73	SMS	Type 1 T helper cell	-0.221464	5.52978e-07
74	PRDX6	Type 1 T helper cell	-0.141532	0.00149315
75	GSTO1	Type 1 T helper cell	-0.00537653	0.904449
76	ADA	Type 1 T helper cell	0.0603876	0.177172
77	SMS	Type 17 T helper cell	-0.24424	3.07233e-08
78	PRDX6	Type 17 T helper cell	-0.233497	1.2464e-07
79	GSTO1	Type 17 T helper cell	-0.129818	0.00360524
80	ADA	Type 17 T helper cell	0.0344576	0.441556
