# Supplementary material for: Integration RNA bulk and single cell RNA sequencing to explore the change of BCAA metabolism-related immune microenvironment and construct prognostic signature in HNSCC
Source: Research Square preprint supplement (doi:10.21203/rs.3.rs-6030799/v1), 2025-06-25
Supplement: Supplementary file 2 [file 2ec2f4dcc64879e226e5a893.docx]

| **Supplementary Table 1 Information on the sequence of the primers** | | |
| --- | --- | --- |
| **Primer** | **Sequence** | |
| PRDX6 F | TGAGGACCATCTTGCCTGGA | |
| PRDX6 R | GGCAAGCTCCCGATTCCTAT | |
| SMS F | GCCAAAGCTGATGGTGAGAC |  |
| SMS R | TATGGGTGGTAATCTGCCGT |  |
| GSTO1 F | TGAACGGCTGGAAGCAATGA |  |
| GSTO1 R | TTATTGCTGACTCCTGCCCC |  |
| ADA F | TCCAAAGTGGAGCCAATCCC |  |
| ADA R | GCATGCAGCACAGGATGGA |  |
| inner-reference-GAPDH F | CGAAGGTGGAGTCAACGGATTT |  |
| inner-reference-GAPDH R | ATGGGTGGAATCATATTGGAAC |  |
